# Supplementary material
Source: Elsevier journal article supplement (https://www.sciencedirect.com/science/article/pii/S0213485320304291)
Supplement: mmc1 [file S0213485320304291:mmc1.doc]

Material suplementario

Figura A1

**Título:** Censo de la población española.
**Descripción:** Gráfico que ilustra la población española por comunidades autónomas a fecha del 1 de enero 2019.


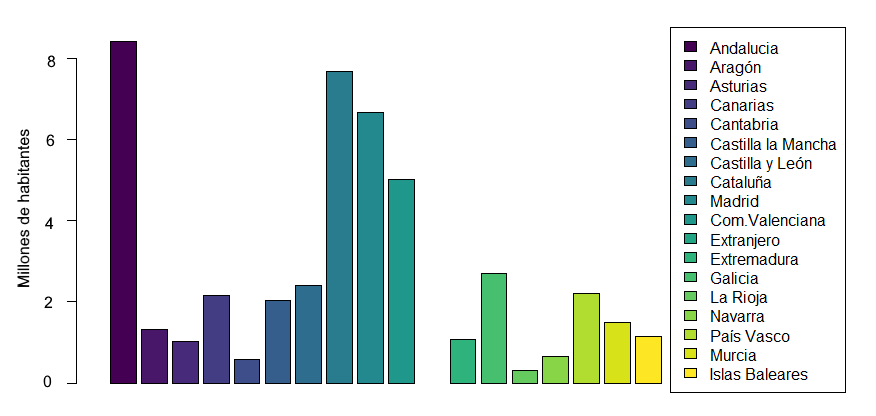


Tabla A1. Relación del número de comunicaciones con respecto a la población española por comunidades autónomas a fecha 1 de enero 2019.

Se detallan las cifras oficiales de población del padrón municipal a 1 de enero 2019 publicadas por el Instituto Nacional de Estadística 32

| **Comunidad Autónoma** | **Habitantes (n)** | **Comunicaciones (n)** | **Razón (com/millónHab)** |
| --- | --- | --- | --- |
| Andalucía | 8.414.240 | 27 | 3,21 |
| Aragón | 1.319.291 | 2 | 1,52 |
| Asturias | 1.022.800 | 3 | 2,93 |
| Canarias | 2.153.389 | 5 | 2,32 |
| Cantabria | 581.078 | 7 | 12,05 |
| Castilla La Mancha | 2.032.863 | 2 | 0,98 |
| Castilla y León | 2.399.548 | 12 | 5,00 |
| Cataluña | 7.675.217 | 80 | 10,42 |
| Comunidad de Madrid | 6.663.394 | 98 | 14,71 |
| Comunidad Valenciana | 5.003.769 | 23 | 4,60 |
| Extranjero | - | 7 | - |
| Extremadura | 1.067.710 | 1 | 0,94 |
| Galicia | 2.699.499 | 3 | 1,11 |
| La Rioja | 316.798 | 1 | 3,16 |
| Navarra | 654.214 | 14 | 21,40 |
| País Vasco | 2.207.776 | 6 | 2,72 |
| Región de Murcia | 1.493.898 | 8 | 5,36 |
| Islas Baleares | 1.149.460 | 0 | 0 |
